# Supplementary material
Source: publisher figshare collection journal article supplement (https://karger.figshare.com/ndownloader/files/31083430)

**Fig. S1. Relationship between changes in  $\log_e$  UACR and %TWL in the medical therapy group and LSG group in subjects with normal albuminuria.**

$r_s$ , Spearman's rank correlation coefficient. Other abbreviations are as in Table 1.

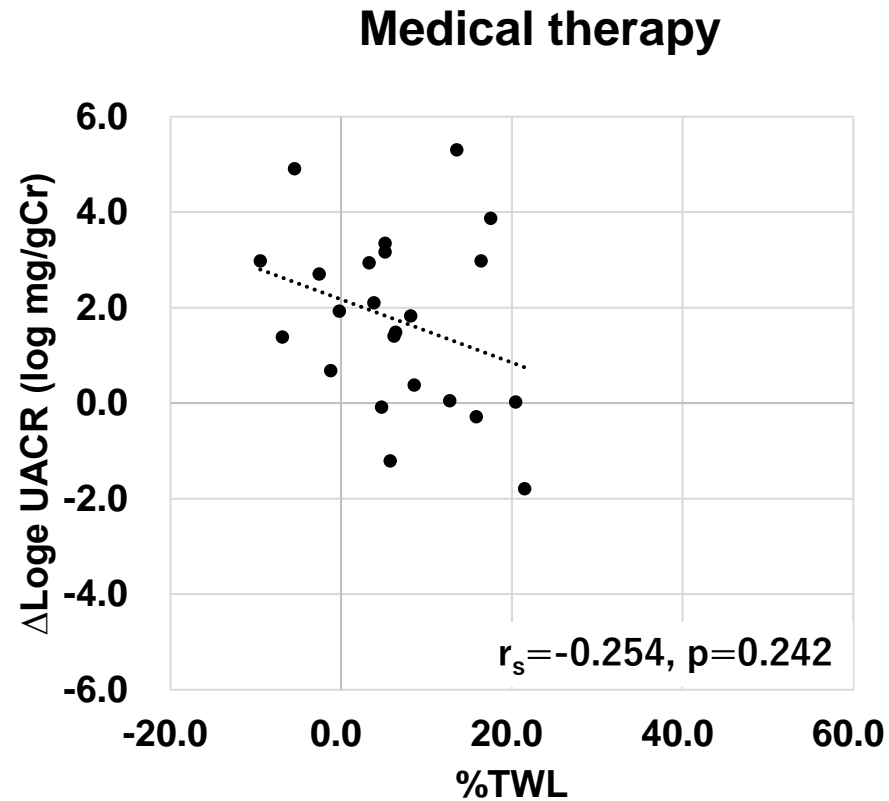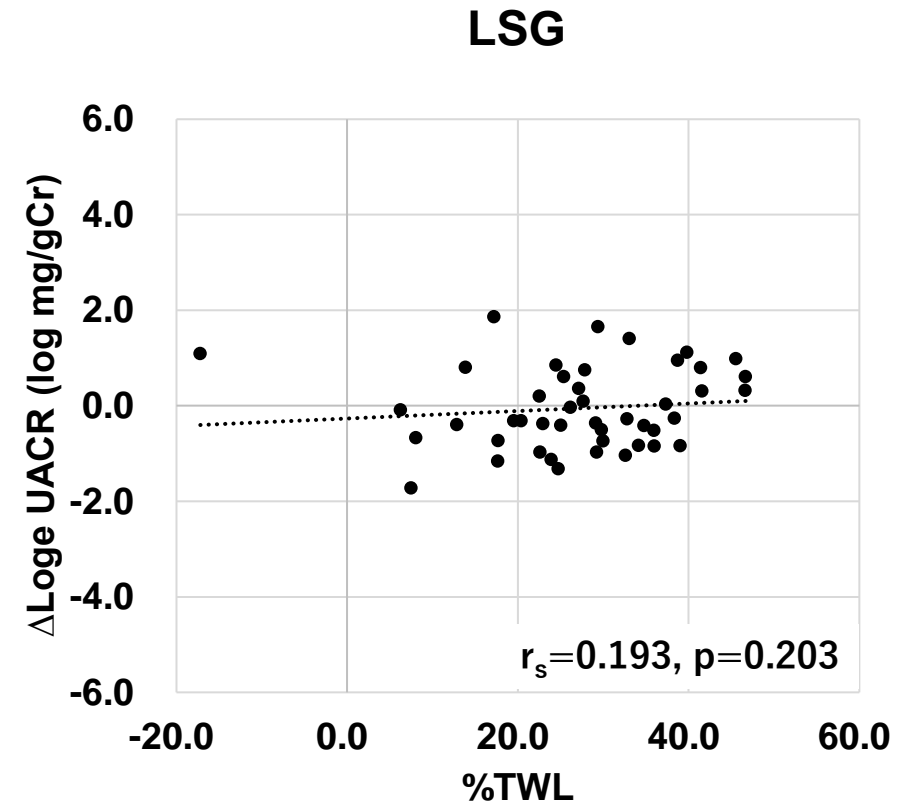

Supplement: Supplementary file 1 [file 31083430]
